# Supplementary material for: Heat shock factor 1 inhibits the mitochondrial apoptosis pathway by regulating second mitochondria-derived activator of caspase to promote pancreatic tumorigenesis
Source: PubMed Central journal article supplement (PMC5422968; doi:10.1186/s13046-017-0537-x), 2017-05-08

Pancreatic carcinoma tissues

**A**

Low differentiation

Middle differentiation

High differentiation

Para-carcinoma tissues

SMAC

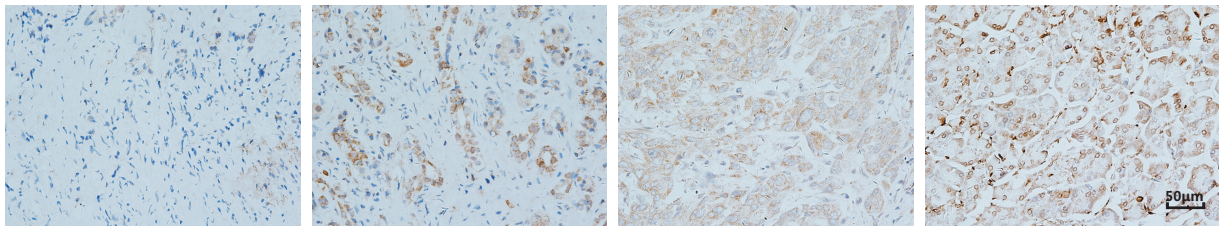

**B**

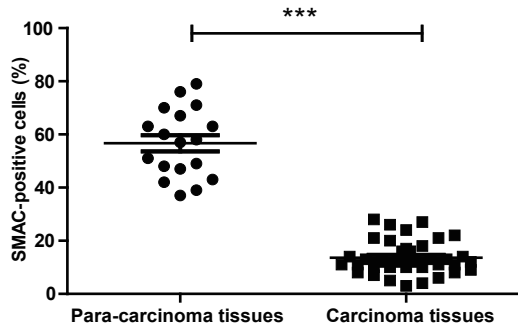

**C**

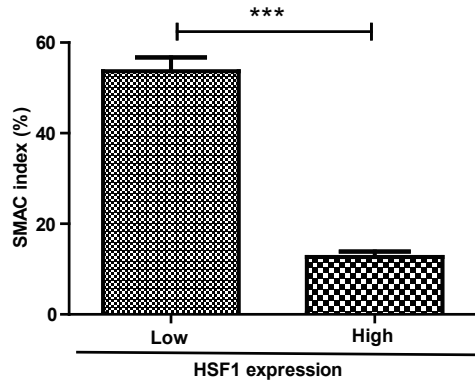

Supplement: 13046_2017_537_MOESM2_ESM.pdf [file 13046_2017_537_MOESM2_ESM.pdf]
