# Supplementary material for: Heat shock factor 1 inhibits the mitochondrial apoptosis pathway by regulating second mitochondria-derived activator of caspase to promote pancreatic tumorigenesis
Source: Springer Nature journal article supplement (doi:10.1186/s13046-017-0537-x), 2017-05-08

**A**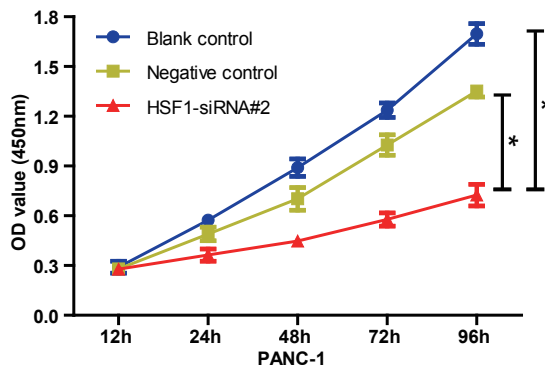**B**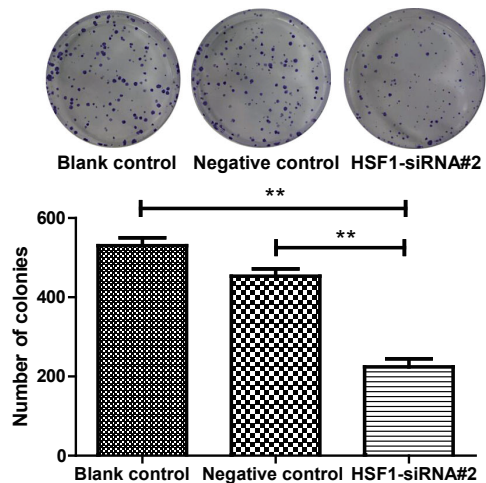**C**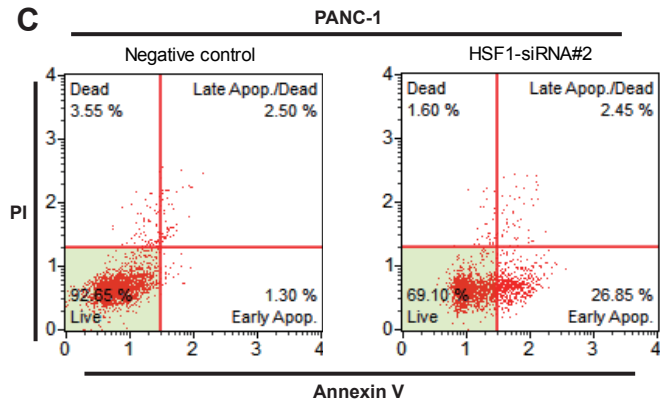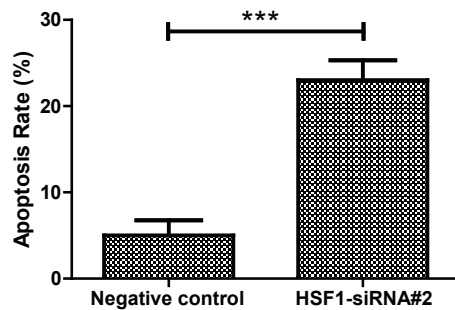**D**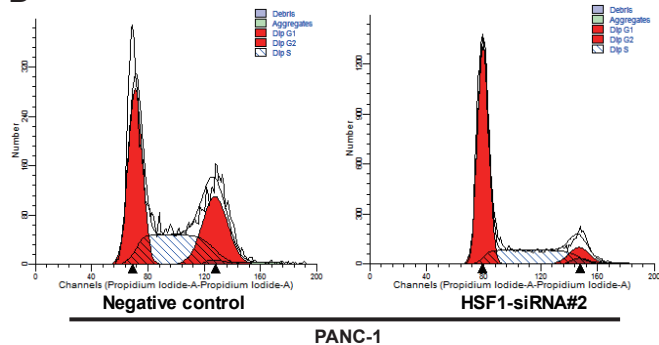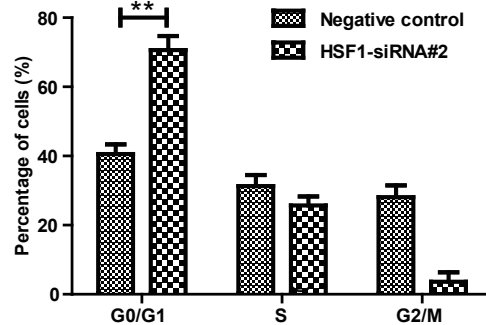

Supplement: MOESM1 [file 12272606]
